# Supplementary material for: Interactions between cerium dioxide nanoparticles and arsenite change their biological fate in the gastrointestinal tract of mice
Source: Royal Society of Chemistry journal article supplement (doi:10.1039/d3en00109a), 2023-01-01
Supplement: d3en00109a1.pdf [file d3en00109a1.pdf]

## **Electronic supplementary information**

### **Interactions between cerium dioxide nanoparticles and arsenite change their biological fate in the gastrointestinal tract of mice**

Yingyan Huang, <sup>1</sup> Judy Tsz-Shan Lum, <sup>1</sup> Wai-Kit Ho, <sup>2</sup> Kelvin Sze-Yin Leung <sup>1,3\*</sup>

<sup>1</sup> Department of Chemistry, Hong Kong Baptist University, Kowloon Tong, Hong Kong Special Administrative Region, China

<sup>2</sup> Department of Applied Biology and Chemical Technology, The Hong Kong Polytechnic University, Hung Hom, Hong Kong Special Administrative Region, China

<sup>3</sup> HKBU Institute of Research and Continuing Education, Shenzhen Virtual University Park, Shenzhen, China

#### **Corresponding Authors**

\*E-mail: [s9362284@hkbu.edu.hk](mailto:s9362284@hkbu.edu.hk) (Kelvin Sze-Yin Leung)

## Materials and methods

### Adsorption of As(III) on CeO<sub>2</sub> NPs in sGIFs and UPW

After temperature pre-equilibration, the solution mixture (2 mL) was incubated in the shaker (120 rpm) at 37 °C for 5 min, and then 0.8 mL of the sample was taken out for subsequent analysis. Thereafter, 2.8 mL of the simulated gastric juice was added to the remaining sample and the pH was adjusted to 2 using HCl. After 2-h incubation, 1 mL of the sample was withdrawn for further analysis. The remaining sample was mixed with 3 mL of the simulated intestinal juice and the pH of resultant mixture was adjusted to 7.5 using NaOH. After another 2-h incubation, 1 mL of the sample was pipetted out for further measurement. Similar procedure was carried out for control experiment using UPW instead of simulated GIT fluids.

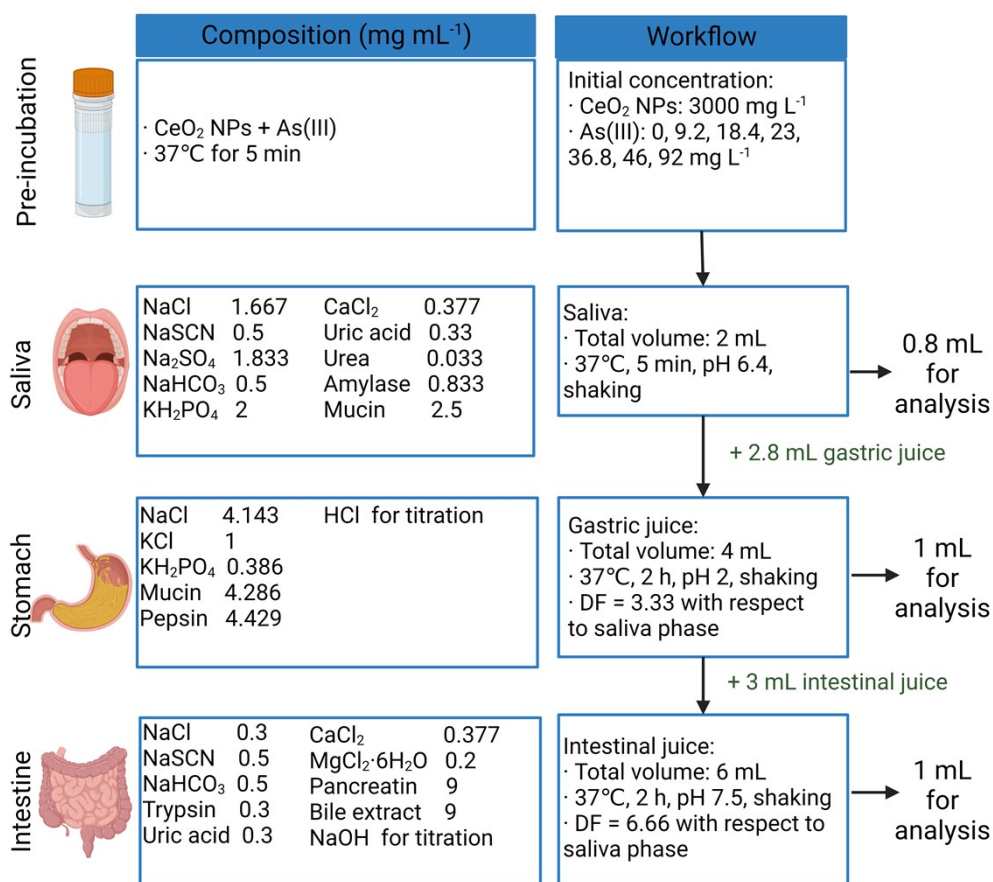

**Fig. S1** Scheme of the *in vitro* GIT model including the composition of the sGIFs, workflow of experiment and the initial concentrations of CeO<sub>2</sub> NPs as well as As(III) in the simulated saliva.

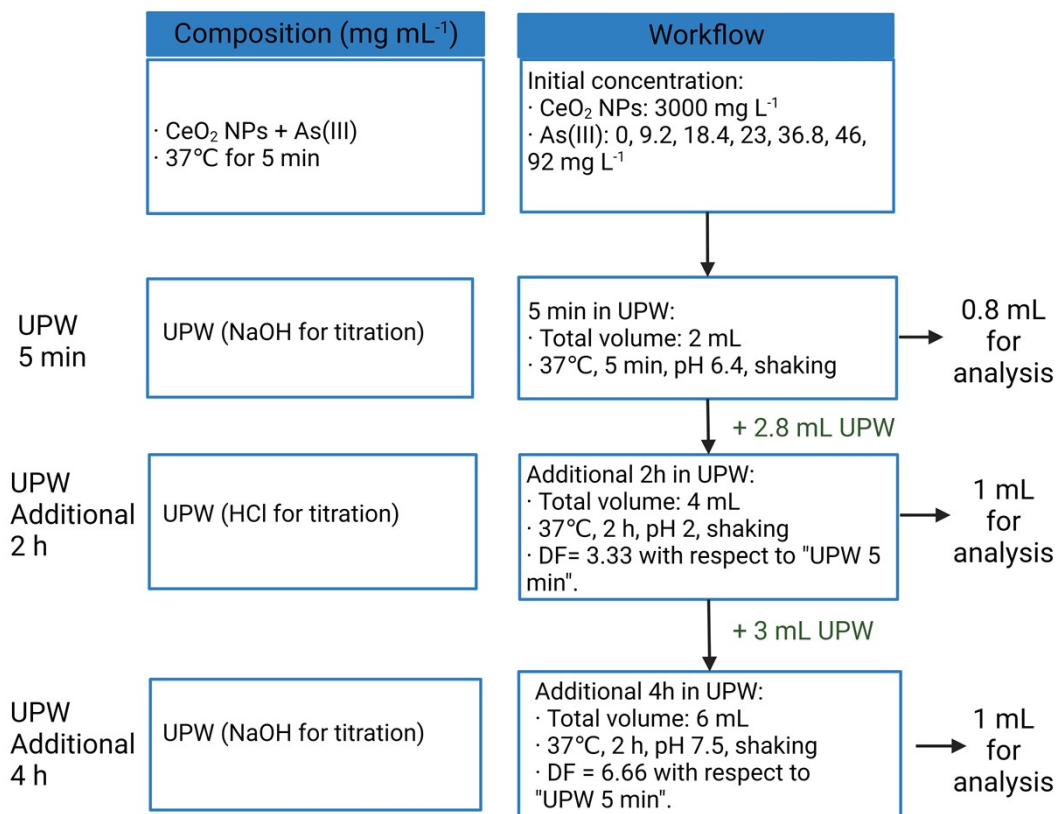

**Fig. S2.** Scheme of the As(III) adsorption onto CeO<sub>2</sub> NPs in UPW.

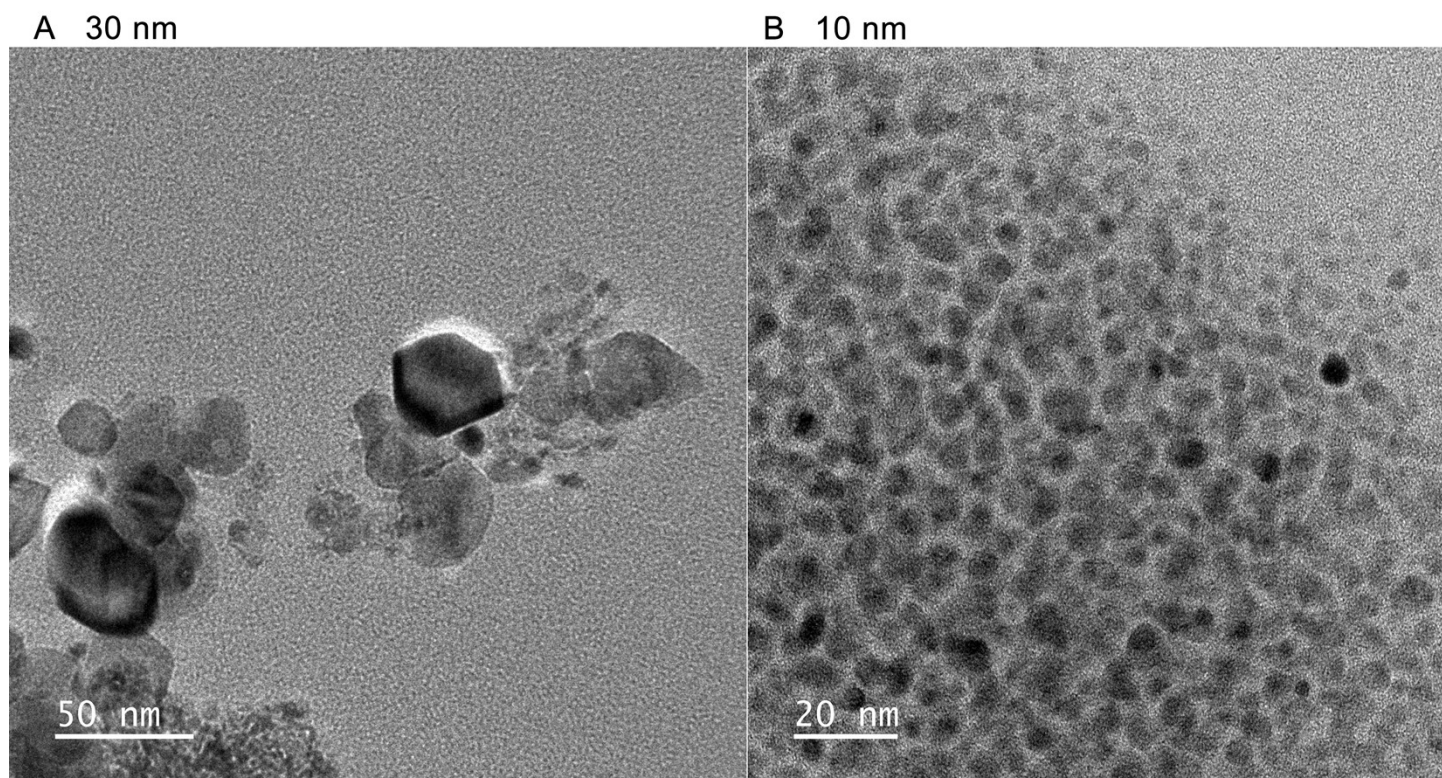

**Fig. S3.** The morphology of pristine (A) 30 nm CeO<sub>2</sub> NPs and (B) 10 nm CeO<sub>2</sub> NPs in ultrapure water as characterized by TEM.

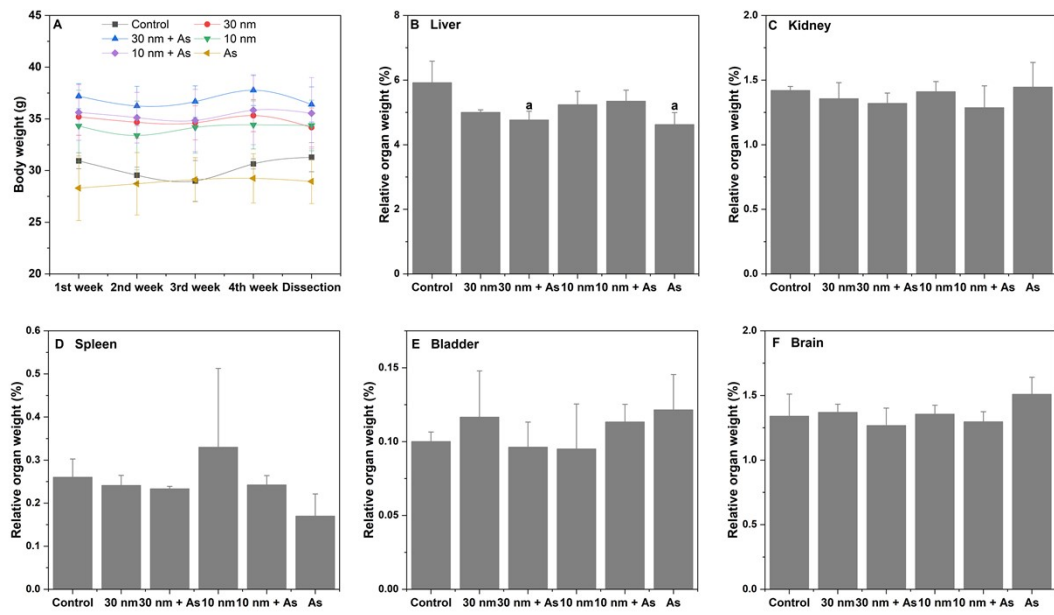

**Fig. S4.** The body weights (A) and relative organ weights (organ weight/body weight) (B – F) of mice (n = 4). The symbol “a” represent significant difference ( $p < 0.05$ ) as compared with control group.

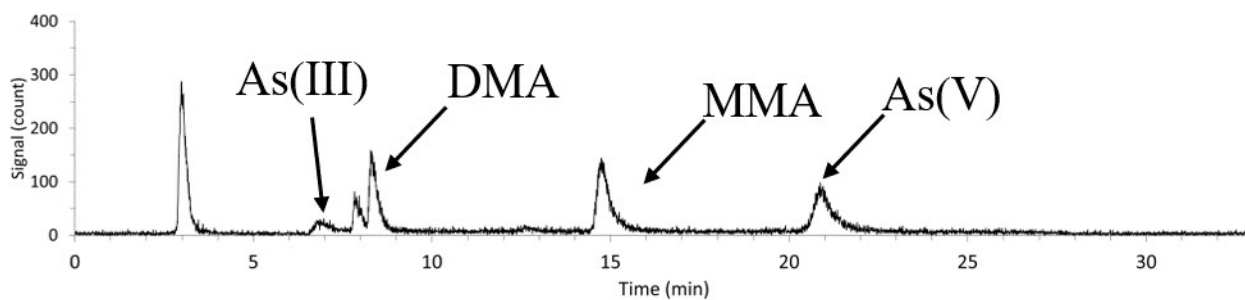

**Fig. S5.** LC-ICP-MS elution profile of As(III) (6.9 min), DMA (8.4 min), MMA (14.8 min) and As(V) (21.0 min) in mice liver.

**Table S1.** Operational parameters for ICP-MS.

| <b>Parameters</b>                          | <b>ICP-MS</b>                                          |
|--------------------------------------------|--------------------------------------------------------|
| RF power (W)                               | 1400                                                   |
| Plasma gas flow (L min <sup>-1</sup> )     | 14.0                                                   |
| Auxiliary gas flow (L min <sup>-1</sup> )  | 1.0                                                    |
| Carrier gas flow (L min <sup>-1</sup> )    | 1.05                                                   |
| Cones                                      | Nickel                                                 |
| Nebulizer and spray chamber                | Micromist, Scott-type double-pass (2 °C)               |
| Sample uptake rate (mL min <sup>-1</sup> ) | 0.25 – 0.35                                            |
| Analysis mode                              | Standard                                               |
| Data acquisition mode                      | Spectrum                                               |
| Integration time                           | -                                                      |
| Measurement duration                       | -                                                      |
| Monitored elements                         | <sup>140</sup> Ce, <sup>103</sup> Rh, <sup>75</sup> As |

**Table S2.** Operational parameters for HPLC-ICP-MS.

---

| <b>ICP-MS parameters</b>                          |                                                        |    |
|---------------------------------------------------|--------------------------------------------------------|----|
| RF power (W)                                      | 1550                                                   |    |
| Lens voltage (V)                                  | -12                                                    |    |
| Nebulizer gas flow (mL min <sup>-1</sup> )        | 1.05                                                   |    |
| Helium gas flow (mL min <sup>-1</sup> )           | 5.0                                                    |    |
| Detection mode                                    | Time-resolved analysis                                 |    |
| Integration time (ms)                             | 400                                                    |    |
| <b>HPLC parameters</b>                            |                                                        |    |
| Sample injection volume (μL)                      | 20                                                     |    |
| Flow rate of mobile phase (mL min <sup>-1</sup> ) | 1                                                      |    |
| Mobile phase A                                    | Ultrapure water                                        |    |
| Mobile phase B                                    | 100 mM (NH <sub>4</sub> ) <sub>2</sub> CO <sub>3</sub> |    |
| Gradient elution ramp:                            |                                                        |    |
| Time (min)                                        | %A                                                     | %B |
| 0 – 3                                             | 96                                                     | 4  |
| 4 – 23                                            | 60                                                     | 40 |
| 24 – 33                                           | 96                                                     | 4  |

---



**Table S3.** Recovery, LOD and LOQ of arsenic species in homogenized liver tissues of mice (n = 3).

|         | <b>Homogenized liver tissue</b> |                   |                   |
|---------|---------------------------------|-------------------|-------------------|
|         | <b>Recovery (%)</b>             | <b>LOD (ng/g)</b> | <b>LOQ (ng/g)</b> |
| As(III) | 96 ± 3                          | 0.01              | 0.03              |
| As(V)   | 96 ± 1                          | 0.01              | 0.03              |
| DMA     | 88 ± 2                          | 0.04              | 0.09              |
| MMA     | 99 ± 2                          | 0.01              | 0.02              |

**Table S4.** Adsorption capacities ( $q_t$ ) of 30 nm CeO<sub>2</sub> NPs for As(III) in sGIFs and UPW.

|              | sGIFs            | $q_t$ (mg/g)     | UPW            | $q_t$ (mg/g)     |
|--------------|------------------|------------------|----------------|------------------|
| <b>Lev 1</b> | Saliva           | $0.61 \pm 0.16$  | 5 min          | $0.58 \pm 0.09$  |
|              | Gastric juice    | $0.90 \pm 0.21$  | Additional 2 h | $2.03 \pm 0.30$  |
|              | Intestinal juice | $1.05 \pm 0.42$  | Additional 4 h | $2.75 \pm 0.40$  |
| <b>Lev 2</b> | Saliva           | $1.10 \pm 0.42$  | 5 min          | $0.84 \pm 0.26$  |
|              | Gastric juice    | $1.73 \pm 0.33$  | Additional 2 h | $3.85 \pm 0.02$  |
|              | Intestinal juice | $2.04 \pm 0.21$  | Additional 4 h | $5.37 \pm 0.32$  |
| <b>Lev 3</b> | Saliva           | $1.85 \pm 0.05$  | 5 min          | $1.04 \pm 0.19$  |
|              | Gastric juice    | $2.44 \pm 0.48$  | Additional 2 h | $4.68 \pm 0.09$  |
|              | Intestinal juice | $3.41 \pm 0.13$  | Additional 4 h | $6.66 \pm 0.43$  |
| <b>Lev 4</b> | Saliva           | $3.36 \pm 0.52$  | 5 min          | $1.63 \pm 0.18$  |
|              | Gastric juice    | $7.88 \pm 0.50$  | Additional 2 h | $7.62 \pm 0.14$  |
|              | Intestinal juice | $13.11 \pm 2.07$ | Additional 4 h | $10.93 \pm 0.19$ |
| <b>Lev 5</b> | Saliva           | $5.22 \pm 0.17$  | 5 min          | $1.94 \pm 0.29$  |
|              | Gastric juice    | $11.04 \pm 0.23$ | Additional 2 h | $9.21 \pm 0.11$  |
|              | Intestinal juice | $17.48 \pm 1.20$ | Additional 4 h | $13.49 \pm 0.12$ |
| <b>Lev 6</b> | Saliva           | $7.02 \pm 0.95$  | 5 min          | $4.36 \pm 0.22$  |
|              | Gastric juice    | $14.31 \pm 1.13$ | Additional 2 h | $17.47 \pm 0.20$ |
|              | Intestinal juice | $22.69 \pm 1.70$ | Additional 4 h | $25.41 \pm 0.65$ |

**Table S5.** Adsorption capacities ( $q_t$ ) of 10 nm CeO<sub>2</sub> NPs for As(III) in sGIFs and UPW.

|              | sGIFs            | $q_t$ (mg/g)     | UPW            | $q_t$ (mg/g)     |
|--------------|------------------|------------------|----------------|------------------|
| <b>Lev 1</b> | Saliva           | $2.59 \pm 0.33$  | 5 min          | $4.25 \pm 0.76$  |
|              | Gastric juice    | $2.41 \pm 0.23$  | Additional 2 h | $4.83 \pm 0.83$  |
|              | Intestinal juice | $2.48 \pm 0.37$  | Additional 4 h | $4.68 \pm 0.78$  |
| <b>Lev 2</b> | Saliva           | $4.99 \pm 0.34$  | 5 min          | $10.15 \pm 1.13$ |
|              | Gastric juice    | $5.49 \pm 0.73$  | Additional 2 h | $9.96 \pm 0.63$  |
|              | Intestinal juice | $4.60 \pm 0.28$  | Additional 4 h | $9.75 \pm 0.90$  |
| <b>Lev 3</b> | Saliva           | $6.52 \pm 0.18$  | 5 min          | $4.43 \pm 0.58$  |
|              | Gastric juice    | $6.92 \pm 0.40$  | Additional 2 h | $5.18 \pm 0.02$  |
|              | Intestinal juice | $5.98 \pm 0.18$  | Additional 4 h | $4.58 \pm 0.36$  |
| <b>Lev 4</b> | Saliva           | $8.64 \pm 0.62$  | 5 min          | $8.93 \pm 0.91$  |
|              | Gastric juice    | $8.63 \pm 1.27$  | Additional 2 h | $9.12 \pm 0.99$  |
|              | Intestinal juice | $7.59 \pm 0.60$  | Additional 4 h | $9.29 \pm 1.21$  |
| <b>Lev 5</b> | Saliva           | $11.01 \pm 0.25$ | 5 min          | $7.39 \pm 0.92$  |
|              | Gastric juice    | $8.31 \pm 1.92$  | Additional 2 h | $13.34 \pm 1.19$ |
|              | Intestinal juice | $8.10 \pm 0.31$  | Additional 4 h | $24.71 \pm 5.58$ |
| <b>Lev 6</b> | Saliva           | $18.24 \pm 0.52$ | 5 min          | $23.13 \pm 3.69$ |
|              | Gastric juice    | $12.24 \pm 1.12$ | Additional 2 h | $24.68 \pm 5.95$ |
|              | Intestinal juice | $11.61 \pm 0.12$ | Additional 4 h | $26.14 \pm 6.46$ |

**Table S6.** Bioaccessibility of As(III) when it is co-existed with 30 nm CeO<sub>2</sub> NPs in sGIFs and UPW.

|              | sGIFs            | As bioaccessibility (%) | UPW            | As bioaccessibility (%) |
|--------------|------------------|-------------------------|----------------|-------------------------|
| <b>Lev 1</b> | Saliva           | 81.3 ± 6.0              | 5 min          | 80.8 ± 2.3              |
|              | Gastric juice    | 75.2 ± 5.7              | Additional 2 h | 36.2 ± 0.3              |
|              | Intestinal juice | 70.2 ± 10.1             | Additional 4 h | 10.3 ± 0.2              |
| <b>Lev 2</b> | Saliva           | 82.8 ± 6.7              | 5 min          | 86.4 ± 3.8              |
|              | Gastric juice    | 67.3 ± 3.3              | Additional 2 h | 39.1 ± 0.4              |
|              | Intestinal juice | 69.3 ± 5.3              | Additional 4 h | 12.4 ± 0.2              |
| <b>Lev 3</b> | Saliva           | 73.5 ± 1.1              | 5 min          | 86.5 ± 2.4              |
|              | Gastric juice    | 67.5 ± 4.9              | Additional 2 h | 40.0 ± 0.7              |
|              | Intestinal juice | 60.3 ± 0.9              | Additional 4 h | 13.7 ± 0.3              |
| <b>Lev 4</b> | Saliva           | 76.2 ± 3.9              | 5 min          | 87.2 ± 1.5              |
|              | Gastric juice    | 58.5 ± 3.1              | Additional 2 h | 40.9 ± 0.7              |
|              | Intestinal juice | 45.5 ± 7.5              | Additional 4 h | 14.3 ± 0.3              |
| <b>Lev 5</b> | Saliva           | 72.8 ± 2.5              | 5 min          | 87.9 ± 1.6              |
|              | Gastric juice    | 59.6 ± 2.9              | Additional 2 h | 42.8 ± 1.0              |
|              | Intestinal juice | 47.3 ± 3.4              | Additional 4 h | 15.3 ± 0.3              |
| <b>Lev 6</b> | Saliva           | 79.0 ± 2.5              | 5 min          | 89.1 ± 5.3              |
|              | Gastric juice    | 66.7 ± 2.6              | Additional 2 h | 43.8 ± 0.5              |
|              | Intestinal juice | 53.1 ± 3.8              | Additional 4 h | 16.6 ± 0.7              |

**Table S7.** Bioaccessibility of As(III) when it is co-existed with 10 nm CeO<sub>2</sub> NPs in sGIFs and UPW.

|              | sGIT             | As bioaccessibility (%) | UPW            | As bioaccessibility (%) |
|--------------|------------------|-------------------------|----------------|-------------------------|
| <b>Lev 1</b> | Saliva           | 0.9 ± 0.2               | 5 min          | 0.3 ± 0.02              |
|              | Gastric juice    | 2.2 ± 0.1               | Additional 2 h | 0.9 ± 0.09              |
|              | Intestinal juice | 3.6 ± 0.4               | Additional 4 h | 0.6 ± 0.02              |
| <b>Lev 2</b> | Saliva           | 2.2 ± 0.2               | 5 min          | 0.6 ± 0.16              |
|              | Gastric juice    | 6.6 ± 1.5               | Additional 2 h | 4.2 ± 2.00              |
|              | Intestinal juice | 9.8 ± 1.0               | Additional 4 h | 0.6 ± 0.23              |
| <b>Lev 3</b> | Saliva           | 3.6 ± 0.03              | 5 min          | 0.2 ± 0.05              |
|              | Gastric juice    | 9.0 ± 1.1               | Additional 2 h | 0.4 ± 0.03              |
|              | Intestinal juice | 12.5 ± 1.1              | Additional 4 h | 0.2 ± 0.02              |
| <b>Lev 4</b> | Saliva           | 11.6 ± 2.0              | 5 min          | 0.2 ± 0.03              |
|              | Gastric juice    | 22.8 ± 2.1              | Additional 2 h | 1.1 ± 0.62              |
|              | Intestinal juice | 27.5 ± 1.7              | Additional 4 h | 0.2 ± 0.02              |
| <b>Lev 5</b> | Saliva           | 16.7 ± 0.5              | 5 min          | 1.9 ± 1.92              |
|              | Gastric juice    | 36.2 ± 5.4              | Additional 2 h | 7.7 ± 7.37              |
|              | Intestinal juice | 35.2 ± 0.1              | Additional 4 h | 0.5 ± 0.56              |
| <b>Lev 6</b> | Saliva           | 33.0 ± 1.4              | 5 min          | 19.3 ± 0.85             |
|              | Gastric juice    | 55.0 ± 3.6              | Additional 2 h | 21.1 ± 4.60             |
|              | Intestinal juice | 56.7 ± 0.9              | Additional 4 h | 6.1 ± 0.06              |
